# Supplementary material for: Three-Country Snapshot of Ornithine Transcarbamylase Deficiency
Source: MDPI journal article supplement (doi:10.3390/life12111721), 2022-10-27
Supplement: s1 [file s1]

Table S1: Questions of the online survey

| <b>OTC Deficiency Patient Population Snapshot</b><br>Please only include alive patients into the survey                                                   |  |
|-----------------------------------------------------------------------------------------------------------------------------------------------------------|--|
| <b>1. Where is your medical centre?</b><br><br>UK<br>Turkey<br>France                                                                                     |  |
| <b>2. What is your clinical centre's name?</b>                                                                                                            |  |
| <b>3. How many OTC deficiency cases are followed up in your clinical centre?</b><br>Total number:<br>Male:<br>Female asymptomatic:<br>Female symptomatic: |  |
| <b>4. Please give the numbers of your patients in each age group</b><br>0-6 years:<br>6-12 years:<br>12-18 years:<br>>18 years:                           |  |
| <b>5. What are the three most common initial symptoms for these patients?</b>                                                                             |  |
| <b>6. How many of these patients had their initial symptom in the first month of life?</b>                                                                |  |
| <b>7. How many of these patients have family history?</b>                                                                                                 |  |
| <b>8. How many of these patients were diagnosed with enzyme activity?</b>                                                                                 |  |
| <b>9. How many of these patients were diagnosed with mutation analysis?</b>                                                                               |  |
| <b>10. How many of these patients are on a protein restricted diet?</b>                                                                                   |  |
| <b>11. How many of these patients are on nitrogen scavengers?</b><br>Only Sodium benzoate:<br>Only Sodium or glycerol phenylbutyrate:<br>Both:            |  |
| <b>12. How many of these patients had liver transplantation?</b>                                                                                          |  |
